# Supplementary material for: Obesity, antenatal depression, diet and gestational weight gain in a population cohort study
Source: PubMed Central journal article supplement (PMC5021737; doi:10.1007/s00737-016-0635-3), 2016-05-13
Supplement: 737_2016_635_MOESM3_ESM.pdf [file 737_2016_635_MOESM3_ESM.pdf]

**Online Resource 3: Associations between participant characteristics and missing data**

| Variable                                           |                | All observed | Any missing  | p value |
|----------------------------------------------------|----------------|--------------|--------------|---------|
| <b>Probable antenatal depression, 18 weeks; %</b>  | No             | 54.7         | 45.3         | <0.001  |
|                                                    | Yes            | 43.7         | 56.3         |         |
| <b>Probable antenatal depression, 32 weeks; %</b>  | No             | 54.9         | 45.1         | <0.001  |
|                                                    | Yes            | 44.7         | 55.3         |         |
| <b>Persistent probable antenatal depression; %</b> | No             | 54.7         | 45.3         | 0.002   |
|                                                    | Yes            | 49.0         | 51.0         |         |
| <b>BMI; %</b>                                      | Underweight    | 48.0         | 52.0         | <0.001  |
|                                                    | Normal weight  | 55.9         | 44.1         |         |
|                                                    | Overweight     | 56.6         | 43.4         |         |
|                                                    | Obese          | 51.0         | 49.0         |         |
| <b>GWG; %</b>                                      | Inadequate     | 57.1         | 42.9         | 0.765   |
|                                                    | Recommended    | 57.3         | 42.7         |         |
|                                                    | Excessive      | 57.9         | 42.1         |         |
| <b>Dietary patterns; mean (sd)</b>                 | Healthy        | 0.14 (0.97)  | -0.15 (1.01) | <0.001  |
|                                                    | Traditional    | -0.02 (0.97) | 0.02 (1.04)  | 0.0177  |
|                                                    | Processed      | -0.06 (0.89) | 0.07 (1.10)  | <0.001  |
|                                                    | Confectionary  | 0.03 (0.96)  | -0.03 (1.04) | <0.001  |
|                                                    | Vegetarian     | -0.04 (0.99) | 0.04 (1.01)  | <0.001  |
| <b>Age (years); %</b>                              | <20            | 21.5         | 78.5         | <0.001  |
|                                                    | 20-24          | 36.6         | 63.4         |         |
|                                                    | 25-34          | 50.2         | 49.9         |         |
|                                                    | 35-39          | 47.1         | 52.9         |         |
|                                                    | 40+            | 47.9         | 52.1         |         |
| <b>Ethnicity; %</b>                                | White          | 52.7         | 47.3         | <0.001  |
|                                                    | Other          | 29.3         | 70.7         |         |
| <b>Marital status; %</b>                           | Married        | 51.7         | 48.3         | <0.001  |
|                                                    | Unmarried      | 33.9         | 66.1         |         |
| <b>Parity; %</b>                                   | Nulliparous    | 54.2         | 45.8         | <0.001  |
|                                                    | Parous         | 45.1         | 54.9         |         |
| <b>Pregnancy size; %</b>                           | Singleton      | 44.7         | 55.3         | <0.001  |
|                                                    | Multiple       | 0.0          | 100.0        |         |
| <b>Educational level; %</b>                        | Degree         | 62.8         | 37.2         | <0.001  |
|                                                    | A level        | 59.9         | 40.1         |         |
|                                                    | O level        | 55.1         | 44.9         |         |
|                                                    | CSE/vocational | 36.8         | 63.2         |         |
| <b>Occupational classification*; %</b>             | I or II        | 67.1         | 33.0         | <0.001  |
|                                                    | IIIa or IIIb   | 62.6         | 37.4         |         |
|                                                    | IV or V        | 58.5         | 41.5         |         |
| <b>Social support; %</b>                           | Low            | 50.3         | 49.7         | <0.001  |
|                                                    | Medium         | 59.6         | 40.4         |         |
|                                                    | High           | 61.0         | 39.0         |         |
| <b>Stressful life events; %</b>                    | 0-2            | 53.6         | 46.4         | <0.001  |
|                                                    | 3-5            | 54.7         | 45.3         |         |
|                                                    | 6+             | 48.8         | 51.2         |         |
| <b>Drug use; %</b>                                 | No             | 51.4         | 48.6         | <0.001  |
|                                                    | Yes            | 41.1         | 58.9         |         |
| <b>Alcohol consumption; %</b>                      | None           | 48.1         | 51.9         | <0.001  |
|                                                    | <1 glass daily | 50.1         | 49.9         |         |
|                                                    | 1+ glass daily | 35.5         | 64.5         |         |
| <b>Smoking; %</b>                                  | No             | 51.7         | 48.3         | <0.001  |
|                                                    | Yes            | 38.5         | 61.5         |         |

| Variable                                        |               | All observed | Any missing | p value             |
|-------------------------------------------------|---------------|--------------|-------------|---------------------|
| <b>Physical activity; %</b>                     | None          | 43.1         | 56.9        | <0.001              |
|                                                 | ≤1 hour/week  | 56.4         | 43.6        |                     |
|                                                 | ≥2 hours/week | 52.7         | 47.3        |                     |
| <b>Pre-pregnancy smoking; %</b>                 | No            | 52.2         | 47.8        | <0.001              |
|                                                 | Yes           | 40.8         | 59.2        |                     |
| <b>Partner occupational social class; %</b>     | High          | 60.6         | 39.4        | <0.001              |
|                                                 | Low           | 51.3         | 48.7        |                     |
| <b>First trimester binge drinking; %</b>        | No            | 49.6         | 50.4        | 0.001               |
|                                                 | Yes           | 45.6         | 54.4        |                     |
| <b>History of depression; %</b>                 | No            | 52.2         | 47.8        | <0.001              |
|                                                 | Yes           | 41.6         | 58.4        |                     |
| <b>History of other psychiatric disorder; %</b> | No            | 51.2         | 48.8        | 0.749               |
|                                                 | Yes           | 52.2         | 47.8        |                     |
| <b>Has a partner; %</b>                         | No            | 17.5         | 82.5        | <0.001              |
|                                                 | Yes           | 51.7         | 48.3        |                     |
| <b>Absolute weight gain (mean, sd)</b>          |               | 12.9 (4.6)   | 12.1 (4.9)  | <0.001 <sup>+</sup> |
| <b>CCEI<sup>†</sup>, 18 weeks (median, IQR)</b> |               | 12 (7-17)    | 13 (8-19)   | <0.001 <sup>‡</sup> |
| <b>CCEI<sup>†</sup>, 32 weeks (median, IQR)</b> |               | 13 (8-19)    | 15 (10-21)  | <0.001 <sup>‡</sup> |
| <b>Financial difficulties (median, IQR)</b>     |               | 1 (0-4)      | 2 (0-5)     | <0.001 <sup>‡</sup> |
| <b>Pregnancy or neonatal loss; %</b>            | No            | 46.1         | 53.9        | <0.001              |
|                                                 | Yes           | 1.1          | 98.9        |                     |
| <b>Measured GWG by IOM guidelines; %</b>        | Inadequate    | 60.3         | 39.7        | 0.038               |
|                                                 | Recommended   | 62.8         | 37.2        |                     |
|                                                 | Excessive     | 63.0         | 37.0        |                     |

\* I or II: professional, managerial or technical; IIIa or IIIb: routine non-manual or skilled manual; IV or V: partly skilled or unskilled manual

<sup>†</sup>Crown Crisp Experiential Inventory;

<sup>+</sup> Based on a t-test;

<sup>‡</sup>Based on Kruskal-Wallis test
