# Supplementary material for: Obesity, antenatal depression, diet and gestational weight gain in a population cohort study
Source: PubMed Central journal article supplement (PMC5021737; doi:10.1007/s00737-016-0635-3), 2016-05-13
Supplement: 737_2016_635_MOESM4_ESM.pdf [file 737_2016_635_MOESM4_ESM.pdf]

**Online Resource 4: Characteristics of the ALSPAC dataset before and after multiple imputation**

| Variable                            |                     | Observed data | Imputed data |
|-------------------------------------|---------------------|---------------|--------------|
| <b>Depression 18 weeks; %</b>       | <13                 | 86.1          | 85.5         |
|                                     | 13+                 | 13.9          | 14.5         |
| <b>Depression 32 weeks; %</b>       | <13                 | 84.8          | 84.0         |
|                                     | 13+                 | 15.2          | 16.0         |
| <b>Depression both; %</b>           | <13                 | 91.7          | 92.0         |
|                                     | 13+                 | 8.4           | 8.0          |
| <b>BMI; %</b>                       | Underweight         | 5.0           | 5.0          |
|                                     | Normal weight       | 74.4          | 73.8         |
|                                     | Overweight          | 15.1          | 15.4         |
|                                     | Obese               | 5.5           | 5.8          |
| <b>GWG (modelled); %</b>            | Inadequate          | 12.6          | 12.5         |
|                                     | Recommended         | 28.9          | 29.5         |
|                                     | Excessive           | 58.5          | 58.0         |
| <b>Dietary patterns ; mean (sd)</b> | Healthy             | 0.00 (1.00)   | -.03 (1.00)  |
|                                     | Traditional         | 0.00 (1.00)   | -.00 (1.00)  |
|                                     | Processed           | 0.00 (1.00)   | .02 (1.02)   |
|                                     | Confectionary       | 0.00 (1.00)   | -.01 (1.00)  |
|                                     | Vegetarian          | 0.00 (1.00)   | .01 (1.01)   |
| <b>Age; mean (sd)</b>               |                     | 28.0 (5.0)    | 28.0 (5.0)   |
| <b>Ethnicity; %</b>                 | White               | 97.4          | 97.2         |
|                                     | Non white           | 2.6           | 2.8          |
| <b>Parity; %</b>                    | Primiparous         | 44.9          | 45.0         |
|                                     | Multiparous         | 55.1          | 55.0         |
| <b>Pregnancy size; %</b>            | Single              | 98.6          | 98.6         |
|                                     | Multiple            | 1.4           | 1.4          |
| <b>Marital status; %</b>            | Married             | 74.8          | 74.0         |
|                                     | Unmarried           | 25.2          | 26.0         |
| <b>Educational level; %</b>         | Degree              | 13.7          | 12.2         |
|                                     | A level             | 23.9          | 21.9         |
|                                     | O level             | 36.9          | 34.4         |
|                                     | CSE/vocational/none | 25.4          | 31.6         |
| <b>Occupation class; %</b>          | I or II             | 37.3          | 33.3         |
|                                     | IIIa or IIIb        | 50.6          | 51.1         |
|                                     | IV or V             | 12.0          | 15.6         |
| <b>Social support; %</b>            | Low                 | 33.9          | 35.8         |
|                                     | Medium              | 35.4          | 34.9         |
|                                     | High                | 30.6          | 29.3         |
| <b>Stressful life events; %</b>     | 0-2                 | 38.8          | 38.2         |
|                                     | 3-5                 | 40.1          | 40.1         |
|                                     | 6+                  | 21.1          | 21.7         |
| <b>Alcohol consumption; %</b>       | None                | 45.4          | 45.5         |
|                                     | <1 glass daily      | 52.7          | 52.6         |
|                                     | 1+ glass daily      | 1.9           | 2.0          |
| <b>Smoking; %</b>                   | No                  | 74.9          | 74.2         |
|                                     | Yes                 | 25.2          | 25.8         |
| <b>Hard drug use; %</b>             | No                  | 99.5          | 99.5         |
|                                     | Yes                 | 0.5           | 0.5          |
| <b>Marijuana use; %</b>             | No                  | 97.4          | 97.3         |
|                                     | Yes                 | 2.6           | 2.7          |

| Variable                |               | Observed data | Imputed data |
|-------------------------|---------------|---------------|--------------|
| Physical activity;<br>% | None          | 15.5          | 15.7         |
|                         | Low           | 27.9          | 28.0         |
|                         | Moderate-high | 56.6          | 56.3         |

\* I or II: professional, managerial or technical; IIIa or IIIb: routine non-manual or skilled manual; IV or V: partly skilled or unskilled manual (Based on Office of Population Censuses and Surveys occupational classifications, 1991)
