# Supplementary material for: Obesity, antenatal depression, diet and gestational weight gain in a population cohort study
Source: Arch Womens Ment Health. 2016 May 13;19(5):899–907. doi: 10.1007/s00737-016-0635-3 (PMC5021737; doi:10.1007/s00737-016-0635-3)
Supplement: Supplementary file 2 — Online Resource 2 Variables included in the multiple imputation model and proportion of missing data for each variable (PDF 30 kb) [file 737_2016_635_MOESM2_ESM.pdf]

**Online Resource 2: Variables included in the multiple imputation model and proportion of missing data for each variable**

| Analysis variables                |                | Auxiliary variables                                |                |
|-----------------------------------|----------------|----------------------------------------------------|----------------|
| Variable and method of imputation | Observed n (%) | Variable and method of imputation                  | Observed n (%) |
| EPDS at 18 weeks' gestation (pmm) | 11,999 (82.5)  | Pre-pregnancy smoking (logit)                      | 13,190 (90.7)  |
| EPDS at 32 weeks' gestation (pmm) | 11,953 (82.2)  | Partner occupation (ologit)                        | 10,904 (75.0)  |
| Pre-pregnancy BMI (pmm)           | 11,529 (78.6)  | First trimester binge drinking (ologit)            | 12,983 (89.3)  |
| Dietary pattern scores (pmm)      | 12,040 (82.8)  | History of depression (logit)                      | 12,448 (85.6)  |
| GWG (modelled) (ologit)           | 11,061 (76.1)  | History of other psychiatric disorder (logit)      | 12,448 (85.6)  |
| Age (regress)                     | 13,896 (95.6)  | Has a partner (logit)                              | 12,413 (85.4)  |
| Marital status (logit)            | 13,391 (92.1)  | Absolute weight gain (regress)                     | 12,286 (84.5)  |
| Ethnicity (logit)                 | 12,248 (84.2)  | Crown Crisp Experiential Inventory, 18 weeks (pmm) | 11,419 (78.5)  |
| Parity (ologit)                   | 12,957 (89.1)  | Crown Crisp Experiential Inventory, 32 weeks (pmm) | 11,292 (77.7)  |
| Pregnancy size (logit)            | 14,472 (99.5)  | Financial difficulties (ologit)                    | 12,011 (82.6)  |
| Education level (ologit)          | 12,340 (84.9)  | Pregnancy or neonatal loss (logit)                 | 14,472 (99.5)  |
| Occupational class (ologit)       | 9,997 (68.8)   | Measured GWG (ologit)                              | 11,061(76.1)   |
| Alcohol consumption (ologit)      | 13,029 (89.6)  |                                                    |                |
| Hard drug use (logit)             | 12,931 (88.9)  |                                                    |                |
| Marijuana use (logit)             | 12,142 (83.5)  |                                                    |                |
| Smoking (logit)                   | 13,190 (90.7)  |                                                    |                |
| Physical activity (ologit)        | 12,206 (83.9)  |                                                    |                |
| Stressful life events (pmm)       | 12,031 (82.7)  |                                                    |                |
| Social support score (pmm)        | 11,423 (78.6)  |                                                    |                |
| Social network score (pmm)        | 12,083 (83.1)  |                                                    |                |

Pmm: predictive mean matching (with the model specified to pick from the ten closest values; Morris, White et al. (2014))
